# Supplementary material for: Tetrandrine Inhibits Skeletal Muscle Differentiation by Blocking Autophagic Flux
Source: MDPI journal article supplement (doi:10.3390/ijms23158148), 2022-07-24
Supplement: s1 [file s1]

**Figure S1**

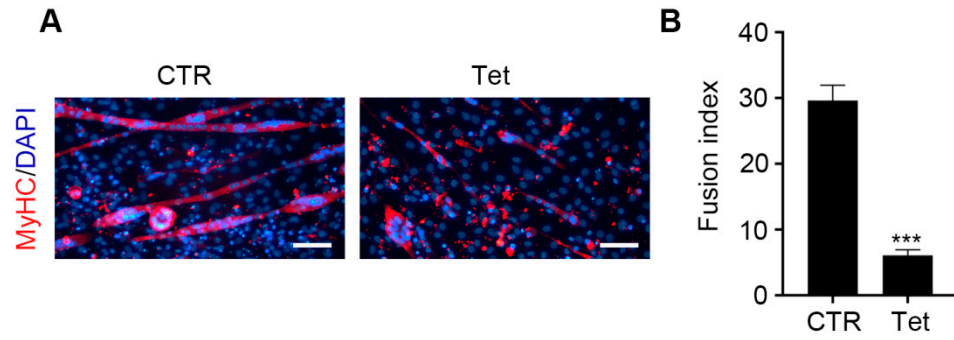

**Figure S1** Tetrandrine inhibits myogenesis of primary mouse myoblasts. **A:** The myoblasts were differentiated for 5 d in DM with or without tetrandrine (2  $\mu$ M) administration, immunostained with anti-MyHC (MF20) (red), the nuclei were counter stained with DAPI (blue). **B:** The fusion index in A were determined.  $n = 3$ , \*\*\*  $p < 0.001$ . Scal bars: 50  $\mu$ m.
